# Supplementary material
Source: MDPI journal article supplement (https://www.mdpi.com/2079-6412/8/3/105)

## Supporting Information

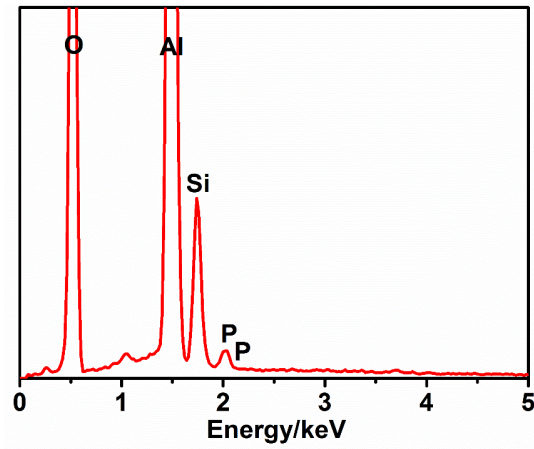

Figure S1. The EDS spectrum of PEO coating formed at 60 min.

Supplement: s1 [file s1]
